# Supplementary material for: Lauric acid in crown daisy root exudate potently regulates root-knot nematode chemotaxis and disrupts Mi-flp-18 expression to block infection
Source: PubMed Central journal article supplement (PMC3883285; doi:10.1093/jxb/ert356), 2013-10-29
Supplement: supp_ert356_jexbot104265_file001.pdf [file supp_ert356_jexbot104265_file001.pdf]

**Journal of Experimental Botany**

**Lauric Acid in Crown Daisy Root Exudate Potently Regulates Root-knot  
Nematode Chemotaxis and Disrupts *Mi-flp-18* Expression to Block Infection**

**Linlin Dong, Xiaolin Li, Li Huang, Ying Gao, Lina Zhong, Yuanyuan Zheng,  
Yuanmei Zuo\***

**Table S1** The primers used in this study

| Genes            | Accession Number | Primers            | Sequences(5'-3')                                |
|------------------|------------------|--------------------|-------------------------------------------------|
| <i>Mi-flp-18</i> | AY729022         | <i>flp-18-F</i>    | 5'-CAATTTTGGAGGACCTAGTG-3'                      |
|                  |                  | <i>flp-18-R</i>    | 5'-CAATGGCGGAAAAGACGATAG-3'                     |
|                  |                  | <i>T7-flp-18-F</i> | 5'-TAATACGACTCACTATAGGGCAATTTTGGAGGACCTAGTG-3'  |
|                  |                  | <i>T7-flp-18-R</i> | 5'-TAATACGACTCACTATAGGGCAATGGCGGAAAAGACGATAG-3' |
|                  |                  | <i>Re-flp-18-F</i> | 5'-CCCAAGTTTGAGGGATATT-3'                       |
|                  |                  | <i>Re-flp-18-R</i> | 5'-ATTATTATGACCCGCCTCT-3'                       |
| <i>Actin</i>     | BE225475         | <i>Re-actin-F</i>  | 5'-GTTATTCTTTCACCGCAACCG-3'                     |
|                  |                  | <i>Re-actin-R</i>  | 5'-GAATACCAGCAGATTCCATCCC-3'                    |
| <i>gfp</i>       | AF234298         | <i>gfp-F</i>       | 5'-AGCGGCACGACTTCTTCA-3'                        |
|                  |                  | <i>gfp-R</i>       | 5'-GTGTGGACAGGTAATGGTTGT-3'                     |
|                  |                  | <i>T7-gfp-F</i>    | 5'-TAATACGACTCACTATAGGG AGCGGCACGACTTCTTCA-3'   |
|                  |                  | <i>T7-gfp-R</i>    | 5'-TAATACGACTCACTATAGGGGTGTGGACAGGTAATGGTTGT-3' |
| <i>Mi-flp-1</i>  | AY729023         | <i>Re-flp-1-F</i>  | 5'-TTTGGGTGCTACAAGTGC-3'                        |
|                  |                  | <i>Re-flp-1-R</i>  | 5'-ATTCCTTCTTCGTTTGAGGC-3'                      |
| <i>Mi-flp-7</i>  | AY856132         | <i>Re-flp-7-F</i>  | 5'-CACGCTTCTTCCTCTTCT-3'                        |
|                  |                  | <i>Re-flp-7-R</i>  | 5'-GGTGCTCGTTTAGCCATA-3'                        |
| <i>Mi-flp-12</i> | AY804187         | <i>Re-flp-12-F</i> | 5'-CGTTTTGCTAGAGAATTTCCCG-3'                    |
|                  |                  | <i>Re-flp-12-R</i> | 5'-GAAGCATTTCATTGCTCCC-3'                       |
| <i>Mi-flp-14</i> | AY907829         | <i>Re-flp-14-F</i> | 5'-GGCCGGGGGAGATGAAGA-3'                        |
|                  |                  | <i>Re-flp-14-R</i> | 5'-GCTTCTCTTTTCCCGTC-3'                         |
| <i>Mi-flp-16</i> | EU549831         | <i>Re-flp-16-F</i> | 5'-GCAACAATCACAACAGCAAC-3'                      |
|                  |                  | <i>Re-flp-16-R</i> | 5'-GTTTGTGCTCTCTTCCG-3'                         |

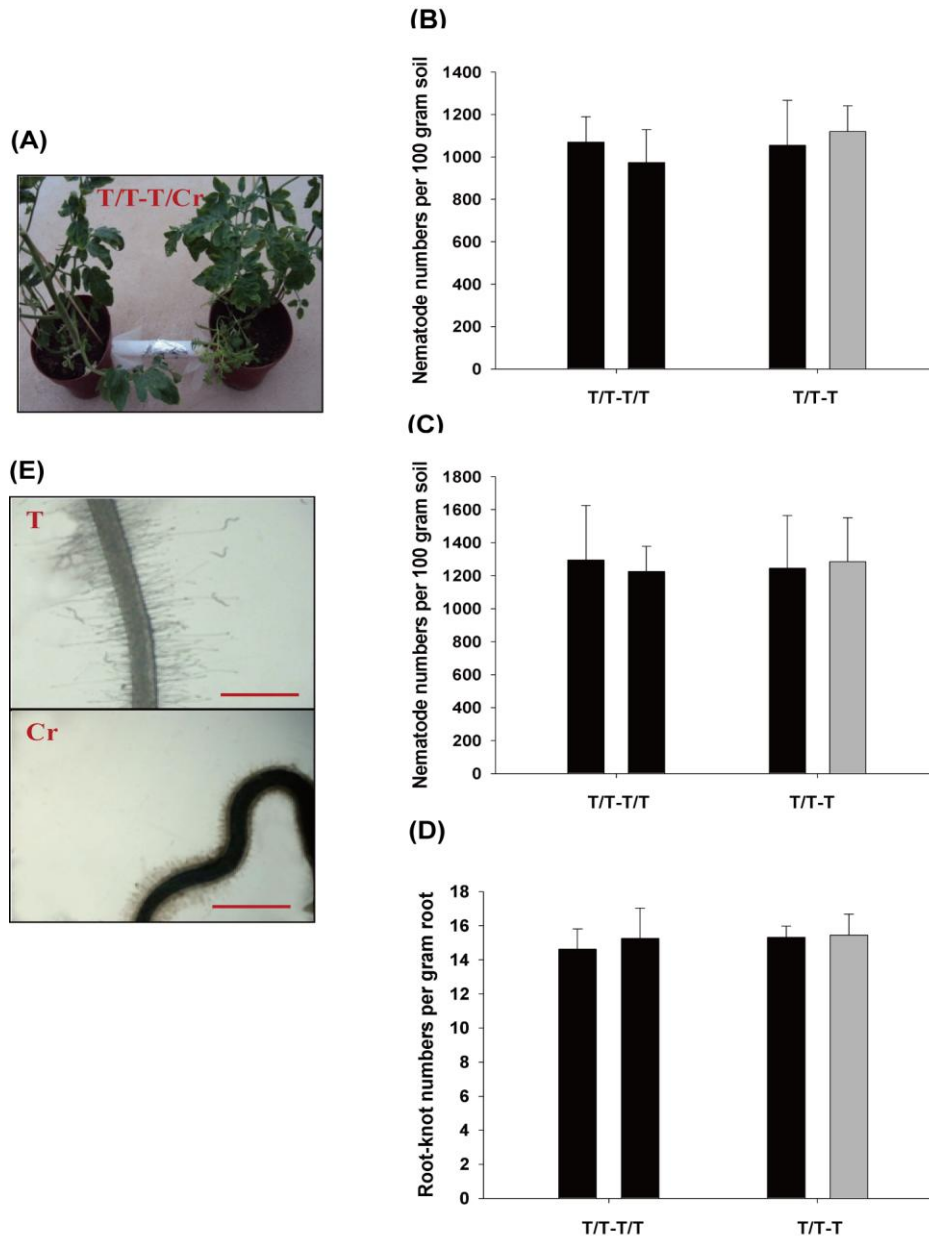

**Figure S1.** Root exudate plays important roles in blocking *M. incognita* infection. T: tomato; Cr: crown daisy; T-T/Cr: two tomato plants in the left pot and one tomato plant with five crown daisy plants in the right pot; T/T-T/T: two tomato plants in the left pot and two tomato plants in the right pot; T/T-T: two tomato plants in the left pot and one tomato plant in the right pot; (A) Depiction of the pot experiment linked by a tube. (B, C and D) Root exudate in the T/T-T/T and T/T-T combinations did not significantly affect the number of nematodes or root knots. (E) Root exudate of tomato and crown daisy regulated J2s chemotaxis in a Petri dish (scale bar, 1 mm). The value of each bar represents the mean  $\pm$  SE of  $n=4$ , where a star denotes a significant difference at  $P<0.05$ .

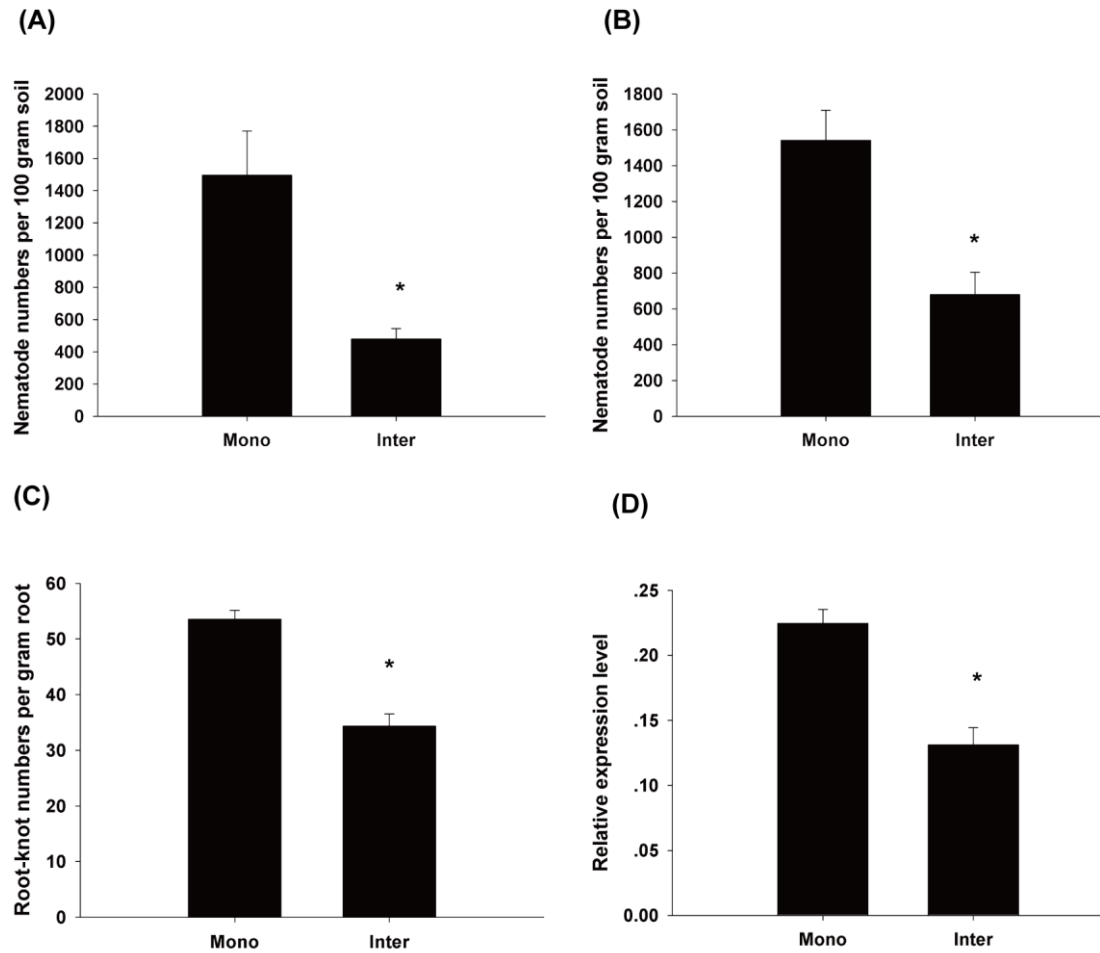

**Figure S2.** Root exudate in the tomato/crown daisy intercropping system reduced the number of nematodes and decreased the damage caused by nematodes by down-regulating *Mi-flp-18* expression in the pot experiment linked by a tube during 2009. Mono: monocropping. Inter: intercropping. (A, B) Root exudate reduced the numbers of nematodes in the tube soil and pot soil. (C) Root exudate reduced the number of root knots. (D) *Mi-flp-18* expression during parasitism.

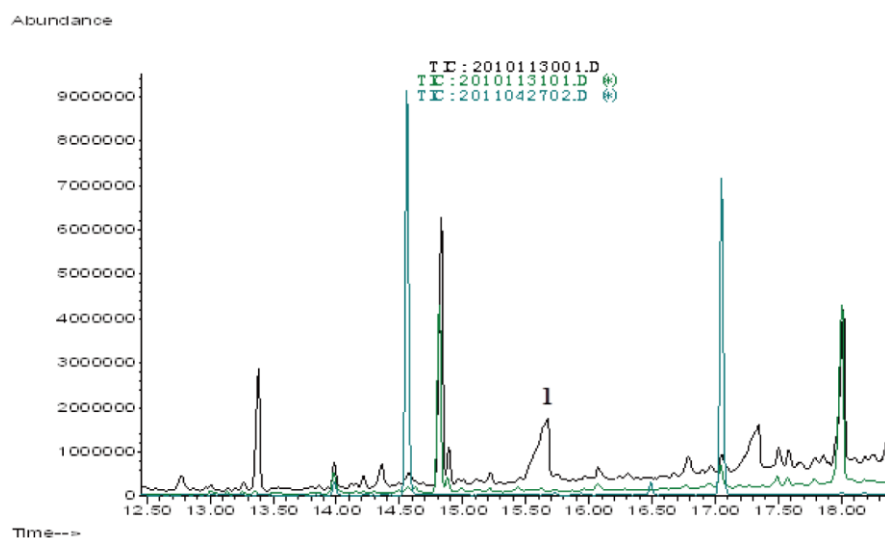

**Figure S3.** Gas chromatogram of root exudate from tomato and crown daisy by GC-MS assay. The numbers 001, 101, and 702 represent the gas chromatograms of crown daisy, tomato and the control, respectively. 1: lauric acid.

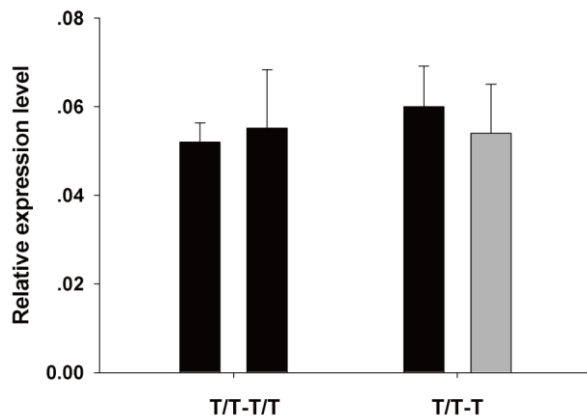

**Figure S4.** *Mi-flp-18* expression is downregulated during parasitism in the tomato/crown daisy intercropping system. T: tomato. T/T-T/T: two tomato plants *versus* two tomato plants in the pot experiment linked by a tube. T/T-T: two tomato plants *versus* one tomato plant in the pot experiment. The value of each bar represents the mean  $\pm$  SE of  $n=4$ , where stars denote a significant difference at  $P<0.05$ .
